# Supplementary material for: The N-alkyldithiocarbamato complexes [M(S2CNHR)2] (M = Cd(ii) Zn(ii); R = C2H5, C4H9, C6H13, C12H25); their synthesis, thermal decomposition and use to prepare of nanoparticles and nanorods of CdS
Source: Royal Society of Chemistry journal article supplement (doi:10.1039/b606661e), 2006-01-01
Supplement: b606661e.pdf [file b606661e.pdf]

**The *N*-alkyldithiocarbamate complexes [M(S<sub>2</sub>CNHR)<sub>2</sub>] (M = Cd(II) Zn(II); R = C<sub>2</sub>H<sub>5</sub>, C<sub>4</sub>H<sub>9</sub>, C<sub>6</sub>H<sub>13</sub>, C<sub>12</sub>H<sub>25</sub>); Their synthesis, thermal decomposition and use to prepare of nano -particles and -rods of CdS**

Mohammad A. Malik,<sup>a</sup> Mohammad Afzaal,<sup>a</sup> Ashfaq A. Memon,<sup>b</sup> Chinh Q. Nguyen,<sup>a</sup> Paul O'Brien<sup>a\*</sup> and Jim Raftery<sup>c</sup>

- a) The School of Chemistry and The School of Materials, The University of Manchester, Oxford Road, Manchester, UK M13 9PL.
- b) Department of Chemistry, Shah Abdul Latif University, Khairpur, Sindh, Pakistan.
- c) The School of Chemistry, The University of Manchester, Oxford Road, Manchester, UK M13 9PL.

**Electronic Supplementary Information (ESI)**

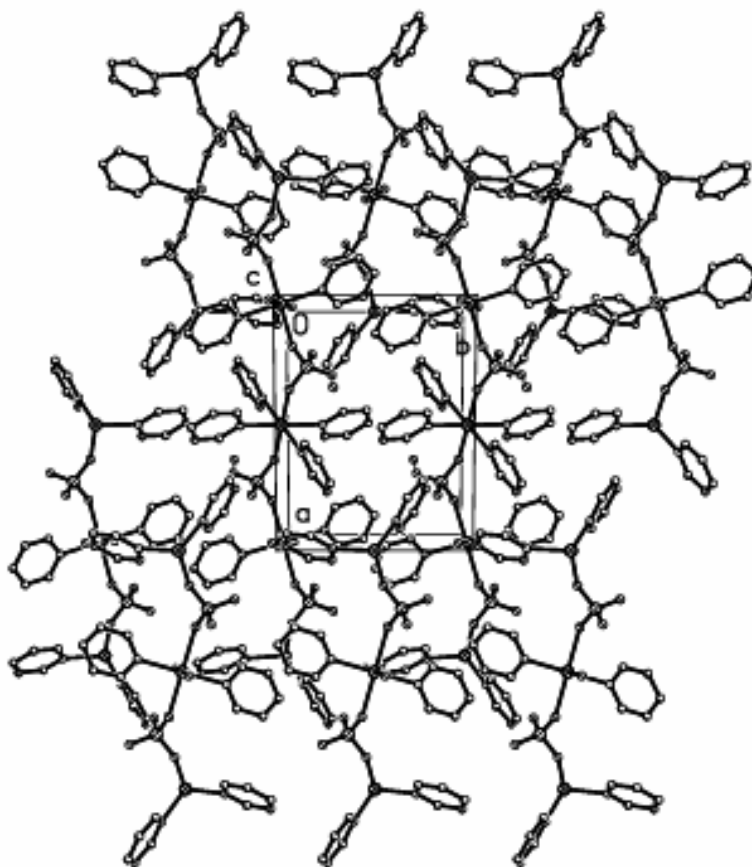

**Fig. S1** The molecular packing diagram of  $[\text{Cd}((\text{SO}_4)_2(\text{NC}_5\text{H}_5)_4)]_n$  (**9**).
